# Supplementary material for: Crystallization of Ethylene Plant Hormone Receptor—Screening for Structure
Source: MDPI journal article supplement (doi:10.3390/biom14030375), 2024-03-20
Supplement: s1 [file s1]

**Supplementary Material**  
**for**  
**Crystallization of ethylene plant hormone receptor –**  
**screening for the structure**

**Buket Rüffer <sup>1,¶</sup>, Yvonne Thielmann <sup>1,¶</sup>, Moritz Lemke <sup>1</sup>, Alexander Minges <sup>1</sup> and  
Georg Groth <sup>1,\*</sup>**

**Author Affiliations:**

<sup>1</sup>Heinrich Heine University Düsseldorf, Faculty of Mathematics and Natural Sciences,  
Institute of Biochemical Plant Physiology, Germany

To whom correspondence should be addressed:

Email: [georg.groth@hhu.de](mailto:georg.groth@hhu.de)

Tel: +49 211 81 12822

Fax: +49 211 81 13569

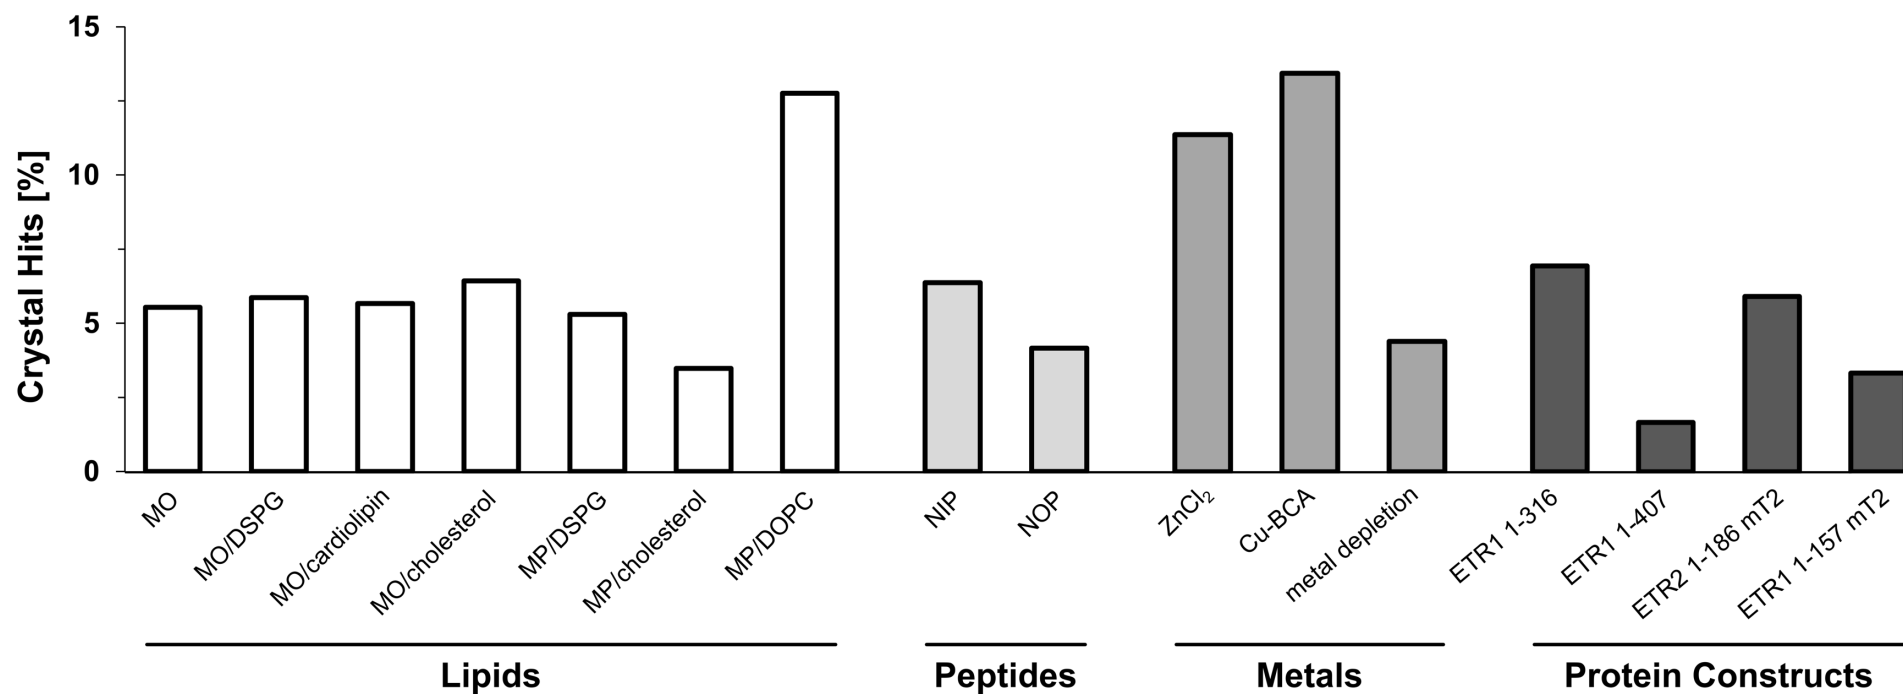

**S1 Fig 1. Compared data of crystallization hits of harvested and measured crystals [%], which were evaluated with regard to the following parameters from left to right: lipids (white), peptides (light grey), metals (dark grey) and protein constructs (black).**

**Table S1.** Primer sequences for cloning.

| Primer name                 | Sequence                                      |
|-----------------------------|-----------------------------------------------|
| ETR2 TMD_CFP_for            | ATGCTGACCCAGGAAATCCGTAAAAGTCTGATGGTGAGCAAGGGC |
| ETR2 TMD_CFP_rev            | CAGACTTTTACGGATTTCCTG                         |
| ETR2 TMD_for                | CCGCATCGTGACTGAC                              |
| CFP rev                     | AGGCAGATCGTCAGTCAGTCACGATGCGGCTTGTACAGCTCGTCC |
| mTurquoise-T65S_for         | ACCACCCTGTCCTGGGGC                            |
| mTurquoise-T65S rev         | CACGAGGGTGGGCCAG                              |
| mTurquoise2_A145Y-I146F_for | TACTTTAGCGACAACGTCTATATCACCG                  |
| mTurquoise2_A145Y-I146F     | GTTGTACTCCAGCTTGTGCC                          |
| ETR2_c-term.-10x His-forI   | CATCATCATCATCACTGACTGACGATCTGCCTCG            |
| ETR2_CFP_10x His            | ATGATGATGATGATGCTTGTACAGCTCGTCCATGC           |
| ETR1 TMD_mT2_for            | catgagattagaagcactttaatggtgagcaagggcgaggagctg |
| GST_TEV_rev                 | caatacaattgcagacttcCATAACCCGGGCCCTGAAAATACAG  |
| ETR1-TMD_for                | ATGgaagtctgcaattgtattgaaccg                   |
| ETR1-TMD_rev                | taaagtgttctaattcatgagtaacattctc               |
